# Supplementary material
Source: Springer Nature journal article supplement (https://www.springermedizin.de/resource/supplementary/12971_2010_102_MOESM3_ESM.pdf/9595378)

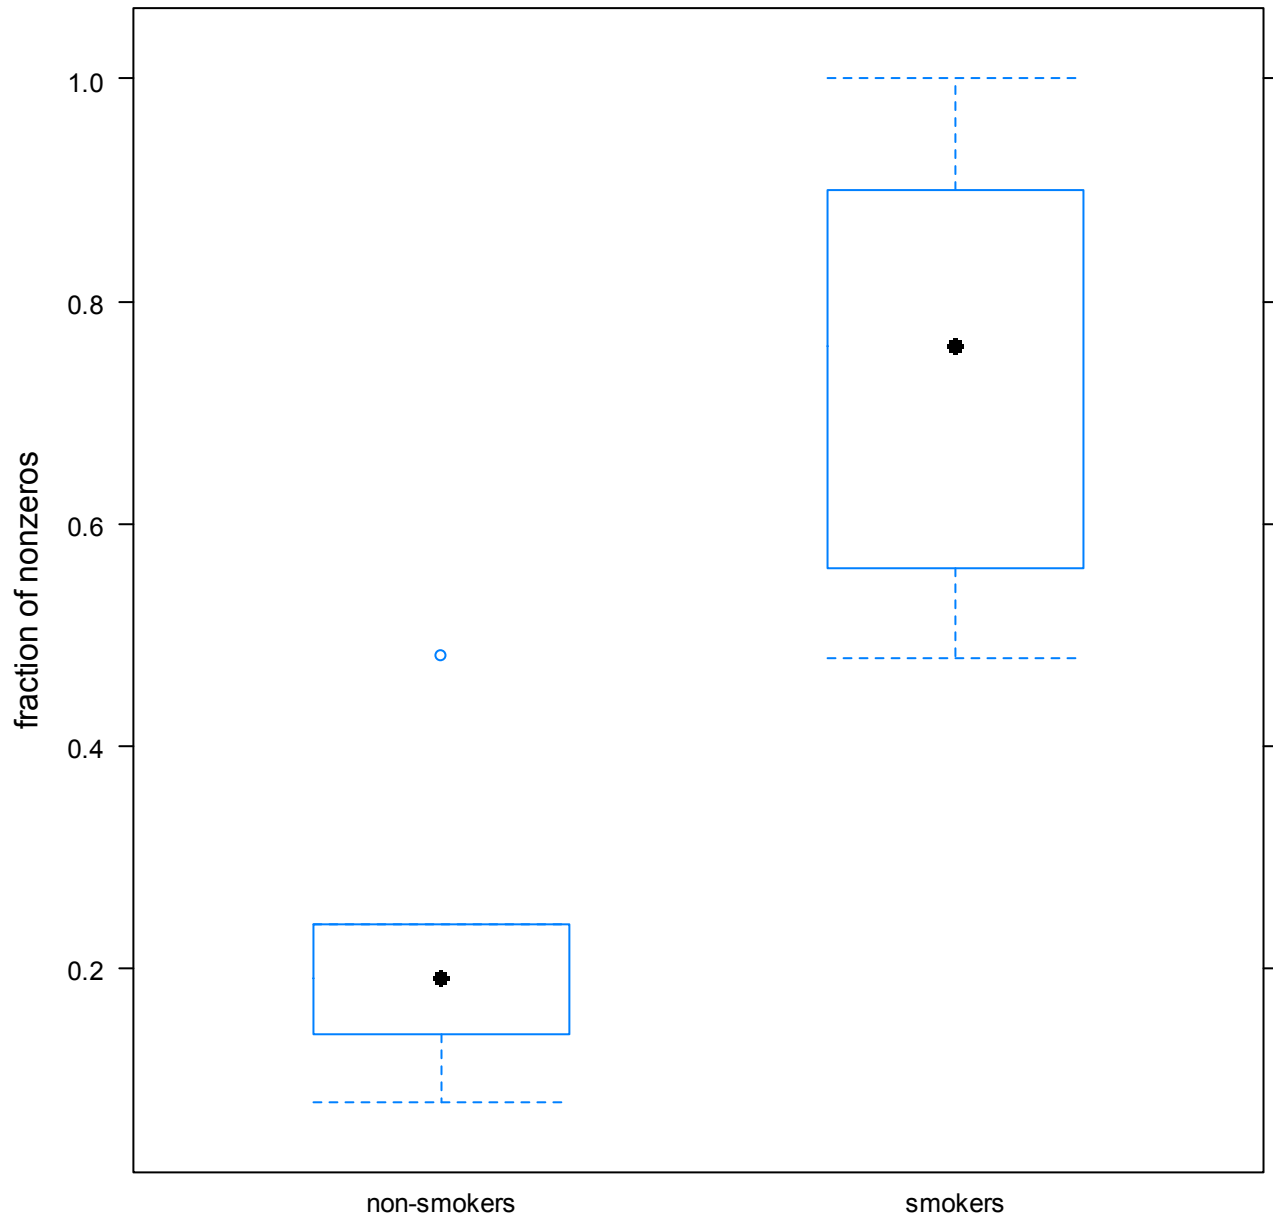

Supplement: MOESM3 [file 9595378]
